# Supplementary material for: Expression of Castanea crenata Allene Oxide Synthase in Arabidopsis Improves the Defense to Phytophthora cinnamomi
Source: PubMed Central journal article supplement (PMC7917121; doi:10.3389/fpls.2021.628697), 2021-02-15
Supplement: Data_Sheet_1.pdf [file Data_Sheet_1.pdf]

# SUPPLEMENTARY MATERIAL

## Expression of *Castanea crenata* Allene Oxide Synthase in *Arabidopsis* Improves the Defense to *Phytophthora cinnamomi*

Serrazina et al.

|                                           | Wild type     | CcAOS1          | CcAOS2          | CcAOS3          |
|-------------------------------------------|---------------|-----------------|-----------------|-----------------|
| Rosette area (cm <sup>2</sup> )           | 0.61 ± 0.14   | 0.71 ± 0.19 *   | 0.79 ± 0.30 *   | 0.83 ± 0.22 *   |
| Root (dry weight; g)                      | 0.0006±0.0002 | 0.0009±0.0005   | 0.0007±0.0005   | 0.0005±0.0002   |
| Aerial (dry weight; g)                    | 0.0049±0.0009 | 0.0069±0.0006 * | 0.0098±0.0034 * | 0.0078±0.0006 * |
| Time of flowering                         | 73±6.67       | 81±14.67        | 94±6.0          | 100±0.00 *      |
| Primary root length (cm)                  | 2.28±1.22     | 3.30±1.02 *     | 2.77±1.14       | 3.55±1.38 *     |
| Lateral root number                       | 6.4±3.5       | 11±4.08 *       | 7.7±6.2         | 10.8±5.5 *      |
| Root hair number<br>(between 5-10mm)      | 67.3±33.1     | 43.6±31.2       | 37.5±25.2 *     | 49.3±40.3       |
| Root hair length (µm)<br>(between 5-10mm) | 243.24±47.79  | 209.13±47.7     | 226.27±38.22    | 228.46±33.14    |

**Supplementary Table 1.** Phenotypical parameters of transgenic *CcAOS* *Arabidopsis* plants.

Rosette area and dry weight were measured 1 month after germination. Time of flowering was measured 2 weeks after germination. The remaining root parameters were measured 13 days after germination. Measurements (means ± standard deviation) are from three independent assays, each using 5 plants per genotype. Asterisks refers to significant differences from the *Ler-0* wild type ( $P < 0.05$ , *t*-test).

| Gene name, locus and relation to pathway (JA – jasmonate; SA – salicylate) | Forward (5'-3')        | Reverse (5'-3')      | Melting temperature (°C) |
|----------------------------------------------------------------------------|------------------------|----------------------|--------------------------|
| ALLENE OXIDE SYNTHASE<br>AT5G42650.1 (JA)                                  | CGACGGTGGGGAATAAACAA   | TCGCCGAAAATCTCAATCA  | 60                       |
| LIPOXYGENASE 1 AT1G55020.1 (JA)                                            | GATGGGCTTGAGGTTTGTA    | TTCACGGGTTTGCATTTAGG | 62                       |
| JASMONATE-ZIM-DOMAIN<br>PROTEIN 10 AT5G13220.1 (JA)                        | CGATTTCTCGGACTTGAGA    | GGAACCGAACGAGATTTAGC | 60                       |
| PLANT DEFENSIN 1.2 AT5G44420.1<br>(JA)<br>(Proietti et al., 2018)          | CACCCTTATCTTCGCTGCTCTT | GCCGGTGCGTCGAAAG     | 58                       |
| PATHOGENESIS-RELATED GENE 5<br>AT1G75040.1 (SA)                            | ACTCCAGGTGCTTCCCGACA   | ACTCCGCCCGGTTACATCTT | 60                       |
| NONEXPRESSER OF PR GENES 1<br>AT1G64280.1 (SA)                             | TTATCTGGCCGCCGAACAAG   | AATCATCCGGCGAGTCAAAG | 60                       |

**Supplementary Table 2.** Primers used in RT-qPCR analysis of jasmonic acid and salicylic acid pathway genes.

|           |                                                                         |
|-----------|-------------------------------------------------------------------------|
|           | ..... ..... ..... ..... ..... ..... ..... ..... ..... ..... ..... ..... |
|           | 5 15 25 35 45 55                                                        |
| Cc AOS    | MASTSLAFP- SLQPKFQSSR KPSKPSTRRF IVRPITASVS EKPSVSVPPA TVVEQAEPTK       |
| At AOS    | MASISTPFPI SLHPKTVRS- ---KPLKFRV LTRPIKASGS E----- TPDL TVATRTGSKD      |
| Consensus | MAS S FP SL PK S KP R RPI AS SE P TV                                    |
|           | ..... ..... ..... ..... ..... ..... ..... ..... ..... ..... ..... ..... |
|           | 65 75 85 95 105 115                                                     |
| Cc AOS    | LPIKKIPGNY GLPFVGPIRD RFDFFYNQGR DEYFKSRAHK YQSTVFRANM PPGPLIASNP       |
| At AOS    | LPIRNIPGNY GLPIVGPDKD RWDYFYDQGA EEFFKSRIRK YNSTVYRVNM PPGAFIAENP       |
| Consensus | LPI IPGNY GLP VGPI D RDFYQG E FKSR KYSTVRNM PPG IA NP                   |
|           | ..... ..... ..... ..... ..... ..... ..... ..... ..... ..... ..... ..... |
|           | 125 135 145 155 165 175                                                 |
| Cc AOS    | NVVVLLDGKS FVPLFDVTKV EKKDLFTGTF MPSTELTGGY RVLSYLDPSE PNHGKLRLL        |
| At AOS    | QVVALLDGKS FVPLFDVDKV EKKDLFTGTY MPSTELTGGY RILSYLDPSE PKHEKLNLL        |
| Consensus | VV LLDGKS FVPLFDV KV EKKDLFTGT MPSTELTGGY R LSYLDPSE PHKLRLL            |
|           | ..... ..... ..... ..... ..... ..... ..... ..... ..... ..... ..... ..... |
|           | 185 195 205 215 225 235                                                 |
| Cc AOS    | FFHLKARRDH VIPEFHSSYT ELFEGLENEL ATKGKAAPGE PSDLAAFNFL ARSLYGTNPV       |
| At AOS    | FFLLKSSNR IFPEFQATYS ELFDSLEKEL SLKGKADFGG SSDGTAFNFL ARAFYGTPA         |
| Consensus | FF LK R PEF Y ELF LE EL KGKA FG SD AFNFL AR YGTNP                       |
|           | ..... ..... ..... ..... ..... ..... ..... ..... ..... ..... ..... ..... |
|           | 245 255 265 275 285 295                                                 |
| Cc AOS    | DTKGLDAPK MIDKWLQVQI SPLFSLGLPK HLDDLLLRV RLPPALVKAD YQKLYDFFYA         |
| At AOS    | DTKLKADAPG LITKWVLFNL HPLLSIGLPR VIEEPLIHTF SLPPALVKSD YQRLYEFFLE       |
| Consensus | DTKL DAP I KW PL S GLP L T LPPALVK D YQ LY FF                           |
|           | ..... ..... ..... ..... ..... ..... ..... ..... ..... ..... ..... ..... |
|           | 305 315 325 335 345 355                                                 |
| Cc AOS    | SSGFVLDEAE RLGISREEAC HNLLFATCFN SFGGMKFLFP NMVKLIGRAG VKLHTQLAEE       |
| At AOS    | SAGEILVEAD KLGISREEAT HNLLFATCFN TWGGMKILFP NMVKRIGRAG HQVHNRLAEE       |
| Consensus | S G L EA LGISREEA HNLLFATCFN GGMK LFP NMVK IGRAG H LAEE                 |
|           | ..... ..... ..... ..... ..... ..... ..... ..... ..... ..... ..... ..... |
|           | 365 375 385 395 405 415                                                 |
| Cc AOS    | IRSVIRSNGG NITMAAMEQM PLMKSVVYES LRIEPPVALQ YGKAKKDLVI ESHDAAFVK        |
| At AOS    | IRSVIKSNGG ELTMGAIEKM ELTKSVVYEC LRFEPVTAQ YGRAKKDLVI ESHDAAFVK         |
| Consensus | IRSVI SNGG TMAEM L KSVVYE LR EPPV Q YG AKKDLVI ESHDAAF VK               |
|           | ..... ..... ..... ..... ..... ..... ..... ..... ..... ..... ..... ..... |
|           | 425 435 445 455 465 475                                                 |
| Cc AOS    | EGEMLFYQF FATKDPKIFE RAEFVADRF VGEEGKLLK HVLWSNGPES ESPSVGNKQC          |
| At AOS    | AGEMLYGYQF LATRDPKIFD RADEFVPERF VGEEGKLLR HVLWSNGPET ETPTVGNKQC        |
| Consensus | GEML GYQF AT DPKIF RA EFV RF VGEEGKLL HVLWSNGPE E P VGNKQC              |
|           | ..... ..... ..... ..... ..... ..... ..... ..... ..... ..... ..... ..... |
|           | 485 495 505 515 525                                                     |
| Cc AOS    | AGKDFVVLVA RLLVVELFLR YDSIEIEVDS SPLGAALTVT SLKKASF                     |
| At AOS    | AGKDFVVLVA RLFVIEIFRR YDSFDIEVGT SPLGSSVNFS SLRKASF                     |
| Consensus | AGKDFVVLVA RLVEFR YDS IEV SPLG SL KASF                                  |

**Supplementary Figure 1.** Alignment of amino acid sequences of *Castanea crenata* (CcAOS) and *Arabidopsis thaliana* (AtAOS) allene oxide synthase.

Clustal W alignment was conducted using the BioEdit Sequence Alignment Editor.

Numbers refer to the amino acid position.

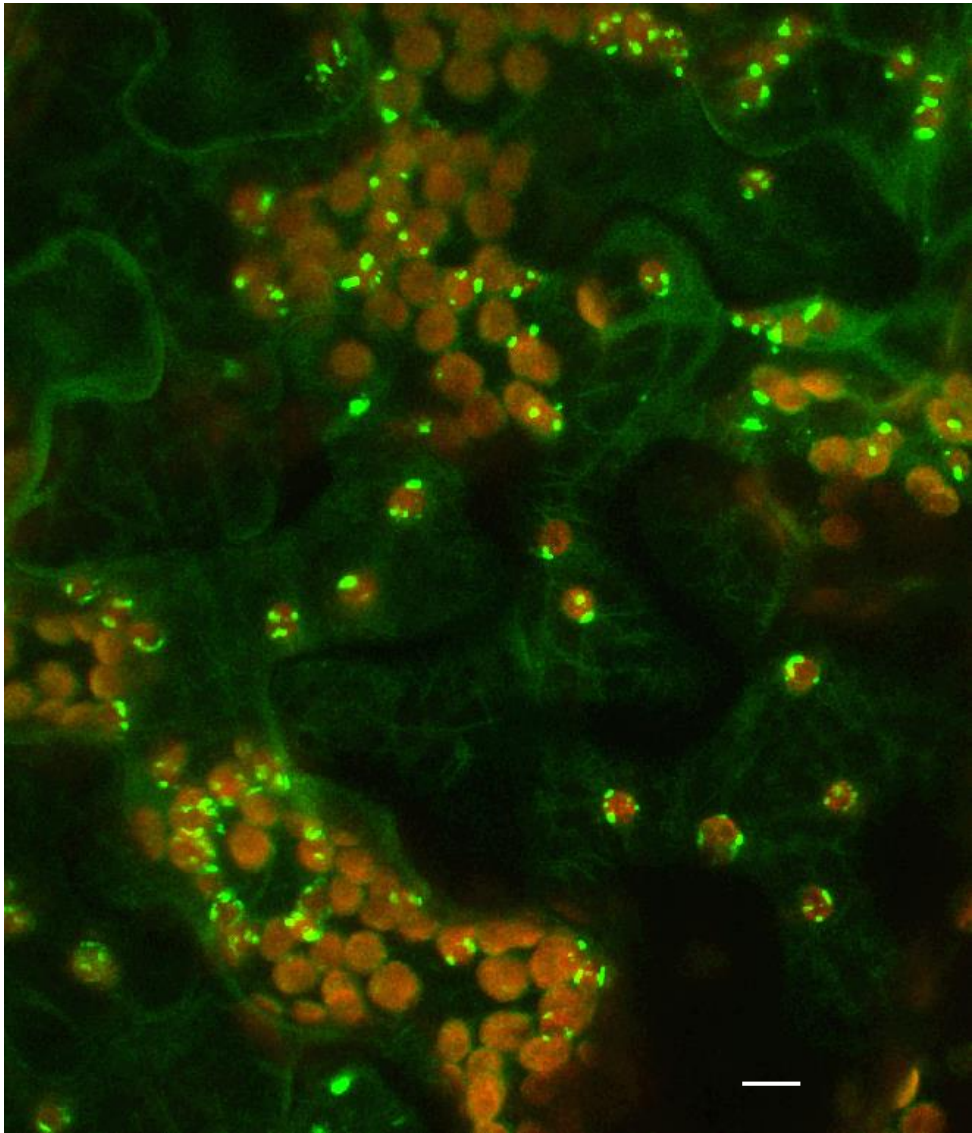

**Supplementary Figure 2.** 2D stack of subcellular imaging upon transient CcAOS-eGFP expression in leaves of *N. benthamiana*. Although CcAOS clearly accumulates at chloroplasts, a reticulate-like signal in the cytosol suggests that trafficking of the protein may involve the endomembrane compartment. Scale Bar = 10  $\mu\text{m}$ .

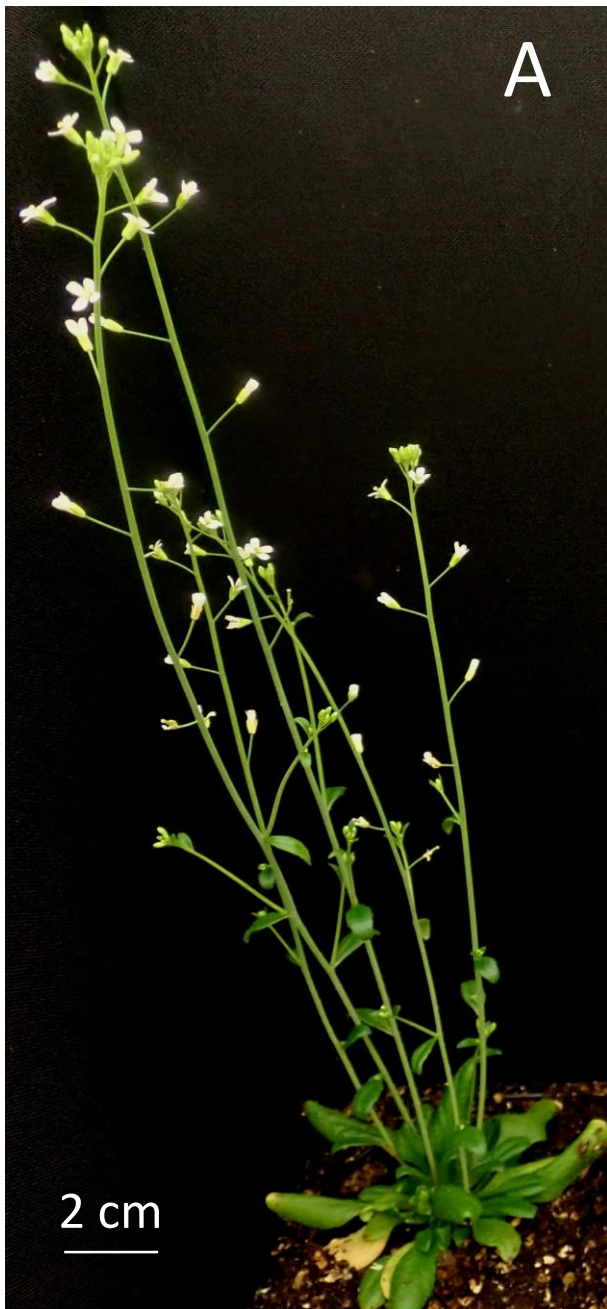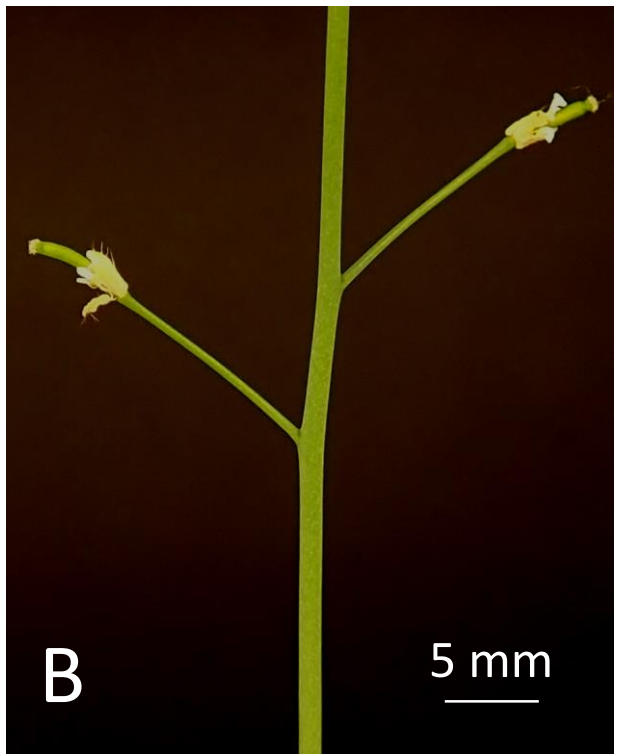

**Supplementary Figure 3.** Two-month old *Arabidopsis thaliana aos-GK624b02* mutant plant (A) and detail of siliques (B). The site of the T-DNA insertion in the mutant (5'UTR) is described in <https://www.gabikat.de/db/visualization.php?lineid=624B02&genecode=At5g42650> and is also reported in <https://www.arabidopsis.org/servlets/TairObject?id=503215774&type=polyallele>

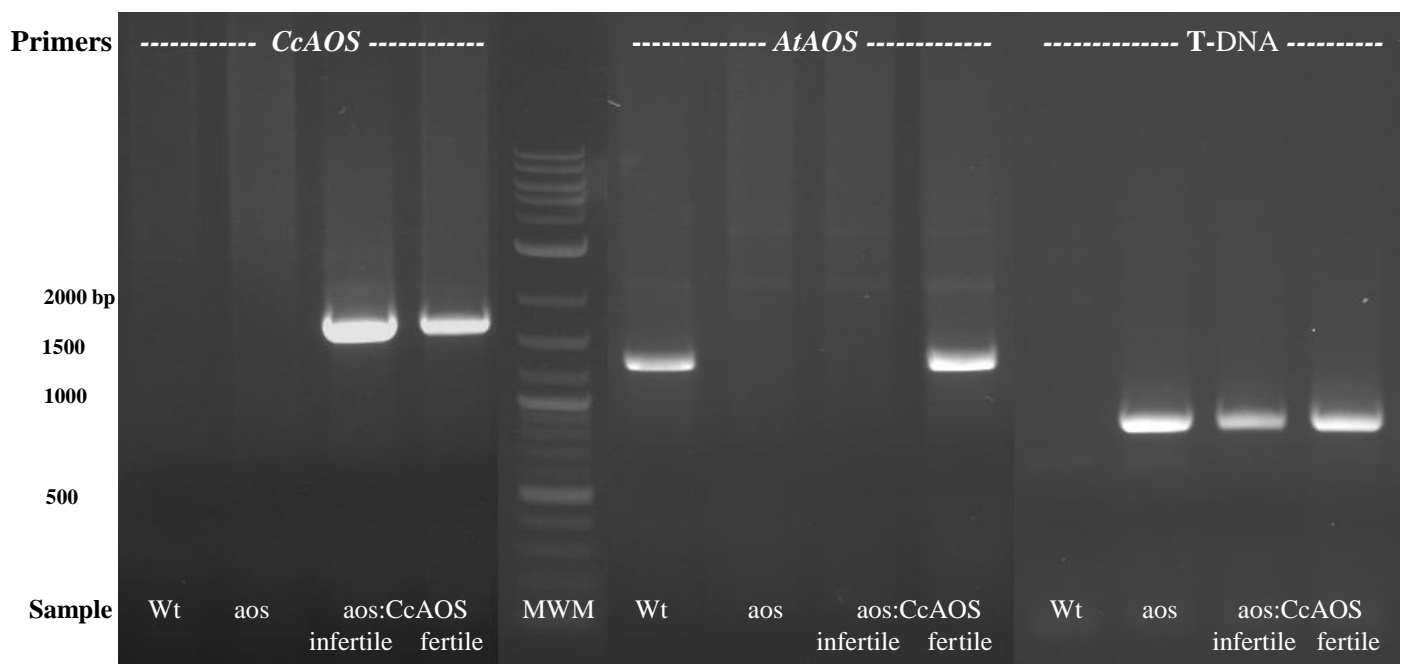

**Supplementary Figure 4.** Genotyping of plants after expression of *CcAOS* gene in *aos-GK624b02* mutants. Genomic DNA of F2 *aos:CcAOS*-infertile and *aos:CcAOS*-fertile plants was screened for *CcAOS*, *AtAOS* and T-DNA insertion and further compared with wild-type Col-0 (Wt) and *aos* plants (used as controls). The expected band sizes are 1581 bp for the amplification of *CcAOS* ORF, 1345 bp for the amplification of a fragment of non-disrupted *AtAOS* and 850 bp for the amplification of a fragment of the T-DNA left border fused to *AtAOS* (T-DNA). MWM: molecular weight marker N3200L (New England Biolabs, Ipswich, MA, USA).
